# Supplementary material for: Nanogold hybrid silica gel and its 1-octadecanethiol self-assembled modified composite as a stationary phase for liquid chromatography
Source: Royal Society of Chemistry journal article supplement (doi:10.1039/c9an00270g), 2019-01-01
Supplement: c9an00270g1.pdf [file c9an00270g1.pdf]

## Electronic Supplementary Information

### **Nanogold hybrid silica gel and its 1-octadecanethiol self-assembled modified composite as stationary phase for liquid chromatography**

Yuhuan Wang<sup>a,c</sup>, Ruyan Wang<sup>b</sup>, Lei Wang<sup>a</sup>, Licheng Wang<sup>a</sup>, Yong Guo<sup>a</sup>, Xiaojing Liang<sup>a,\*</sup>, Shuai Wang<sup>a,\*</sup>

*<sup>a</sup> Key Laboratory of Chemistry of Northwestern Plant Resources and Key Laboratory for Natural Medicine of Gansu Province, Lanzhou Institute of Chemical Physics, Chinese Academy of Sciences, Lanzhou 730000, China*

*<sup>b</sup> Engineering Technology Institute of Xinjiang Oilfield Company*

*<sup>c</sup> University of Chinese Academy of Sciences, Beijing 100049, China*

\*Corresponding author: Xiaojing Liang, Shuai Wang

E-mail: licpws@hotmail.com (Shuai Wang); [xjliang@licp.cas.cn](mailto:xjliang@licp.cas.cn) (Xiaojing Liang)

Phone: + 86 931 4968266

Fax: +86 931 4968013

**SI-Table 1** The results of specific surface area and pore diameter distribution.

| Materials                | Mean size<br>( $\mu\text{m}$ ) | BET surface area<br>( $\text{m}^2 \text{g}^{-1}$ ) | Pore volume<br>( $\text{cm}^3 \text{g}^{-1}$ ) | Pore size<br>( $\text{\AA}$ ) |
|--------------------------|--------------------------------|----------------------------------------------------|------------------------------------------------|-------------------------------|
| Bare silica              | 5                              | 220                                                | 0.5152                                         | 97                            |
| 25vol% sol <sub>Au</sub> | 6                              | 194                                                | 0.5651                                         | 116                           |
| 33vol% sol <sub>Au</sub> | 5.5                            | 195                                                | 0.5769                                         | 118                           |
| 50vol% sol <sub>Au</sub> | 3~6                            | 194                                                | 0.6464                                         | 133                           |

**SI-Table 2** the retention factor of five alkylbenzenes

| EO( <i>k</i> )<br>SPs | Benzene( <i>k</i> ) | Methylbenzene( <i>k</i> ) | Ethylbenzene( <i>k</i> ) | Propylbenzene( <i>k</i> ) | Butylbenzene( <i>k</i> ) |
|-----------------------|---------------------|---------------------------|--------------------------|---------------------------|--------------------------|
| Bare silica           | 0.47                | 0.65                      | 1.03                     | 1.55                      | 2.05                     |
| 25VsolAu%             | 0.48                | 0.85                      | 1.38                     | 2.45                      | 4.43                     |
| 33VsolAu%             | 0.58                | 1.05                      | 1.81                     | 3.30                      | 6.05                     |

(SPs: stationary phases; EO: elution order; *k*: retention factor)

**SI-Table 3** the retention factors and asymmetry factors of five bases.

| Stationary phase | Bare silica                  |                               | 25Vsol <sub>Au</sub> %       |                               | 33Vsol <sub>Au</sub> %       |                               | 50Vsol <sub>Au</sub> %       |                               |
|------------------|------------------------------|-------------------------------|------------------------------|-------------------------------|------------------------------|-------------------------------|------------------------------|-------------------------------|
| Elution order    | Retention factor( <i>k</i> ) | Asymmetry factor( <i>As</i> ) | Retention factor( <i>k</i> ) | Asymmetry factor( <i>As</i> ) | Retention factor( <i>k</i> ) | Asymmetry factor( <i>As</i> ) | Retention factor( <i>k</i> ) | Asymmetry factor( <i>As</i> ) |
| xanthine         | 1.31                         | 2.74                          | 1.24                         | 4.02                          | 1.37                         | 2.54                          | 1.19                         | 2.31                          |
| hypoxanthine     | 2.74                         | 4.11                          | 2.29                         | 3.35                          | 2.48                         | 1.85                          | 2.16                         | 2.42                          |
| adenine          | 4.41                         | -                             | 3.02                         | 4.42                          | 3.08                         | 2.51                          | 2.85                         | 3.25                          |
| guanine          | 4.57                         | -                             | 3.82                         | 1.74                          | 4.34                         | 1.14                          | 3.55                         | 10.1                          |

|          |      |      |      |      |      |      |      |      |
|----------|------|------|------|------|------|------|------|------|
| cytosine | 6.87 | 2.63 | 4.92 | 2.43 | 5.24 | 2.23 | 4.62 | 2.01 |
|----------|------|------|------|------|------|------|------|------|

**SI-Table 4** Repeatability and reproducibility of hybridized column.

|                        | RSD(%)    |           |
|------------------------|-----------|-----------|
|                        | HILIC     | RP        |
| <b>Intra-day (n=8)</b> | 0.38-0.78 | 0.14-0.46 |
| <b>Inter-day (n=8)</b> | 1.01-1.84 | 0.45-1.21 |

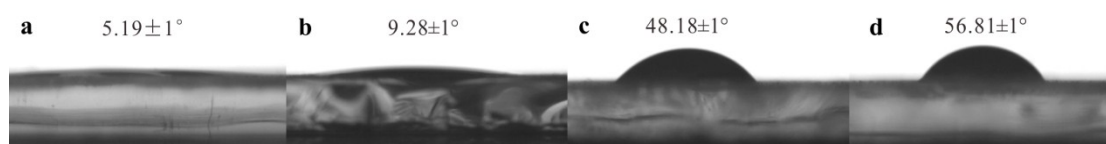

**SI-Fig. 1** Contact angle measurements. Bare silica (a), 25 vol% sol<sub>Au</sub> Au@sil (b), 33 vol% sol<sub>Au</sub> Au@sil (c), 50 vol% sol<sub>Au</sub> Au@sil (d).

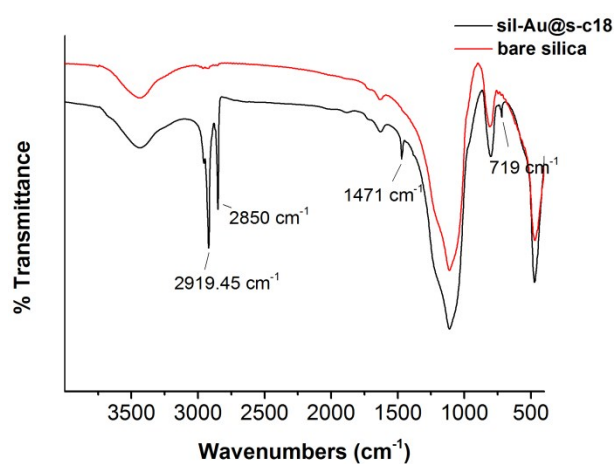

**SI-Fig. 2** FTIR spectra of bare silica and C18-Au@sil stationary.

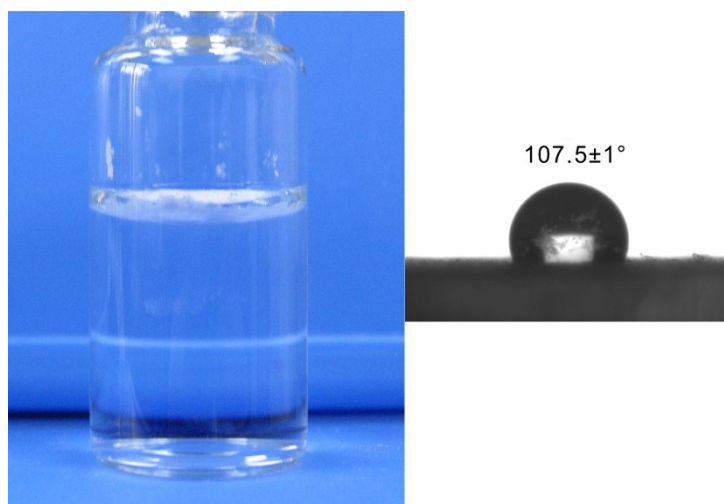

**SI-Fig. 3** Images of hydrophobic property of the C18-Au@sil composites.

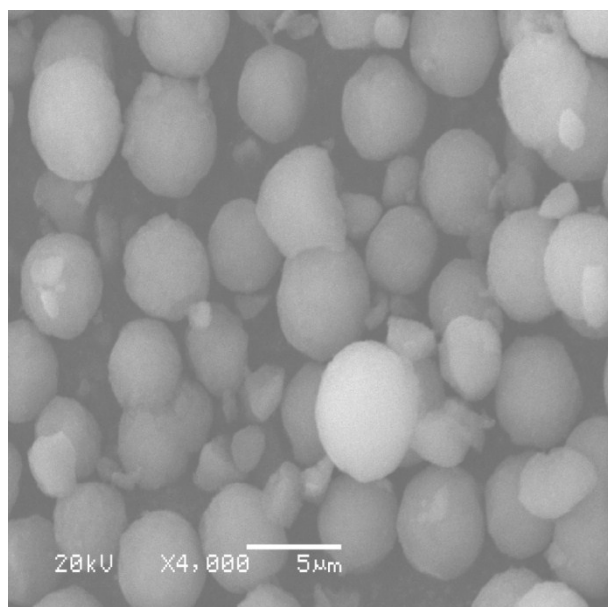

**SI-Fig. 4** SEM images of the 50 vol% sol<sub>Au</sub> Au@sil stationary phase after eluted a period of time.

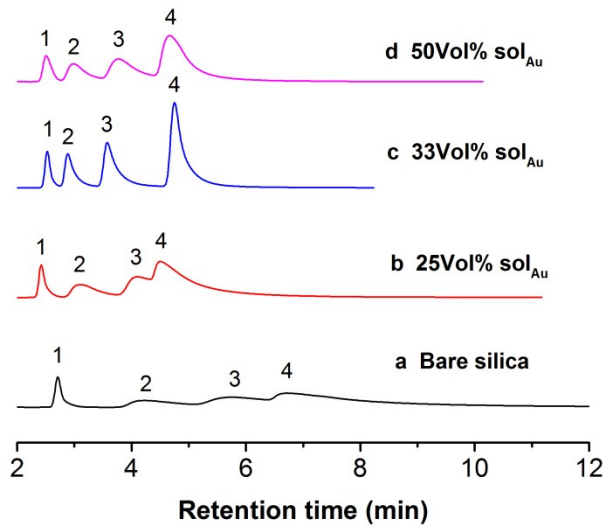

**SI-Fig. 5** The separation of four nucleosides with different  $\text{sol}_{\text{Au}}$  volume ratio hybridized silica and bare silica columns. thymidine (1), uridine (2), adenosine (3), cytidine (4); mobile phase: 85% acetonitrile, 15% 20 mM ammonium acetate, pH = 6.37, flow rate = 1.0 mL min<sup>-1</sup>, T = 25 °C, UV detection: 254nm.

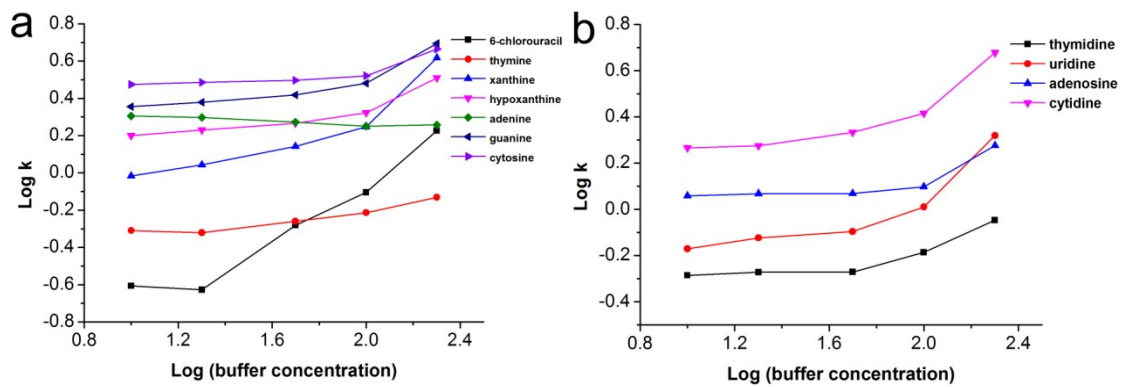

**SI-Fig. 6** Effects of buffer concentration on the retention factor ( $k$ ) with the 33 vol%  $\text{sol}_{\text{Au}}$  Au@sil column. Conditions : (a): 90% acetonitrile, 10% ammonium acetate, pH =6.37, T = 25 °C; (b): 85% acetonitrile, 15% ammonium acetate, pH =6.37, T = 25 °C; flow rate =1.0 mL min<sup>-1</sup>, UV detection: 254 nm.

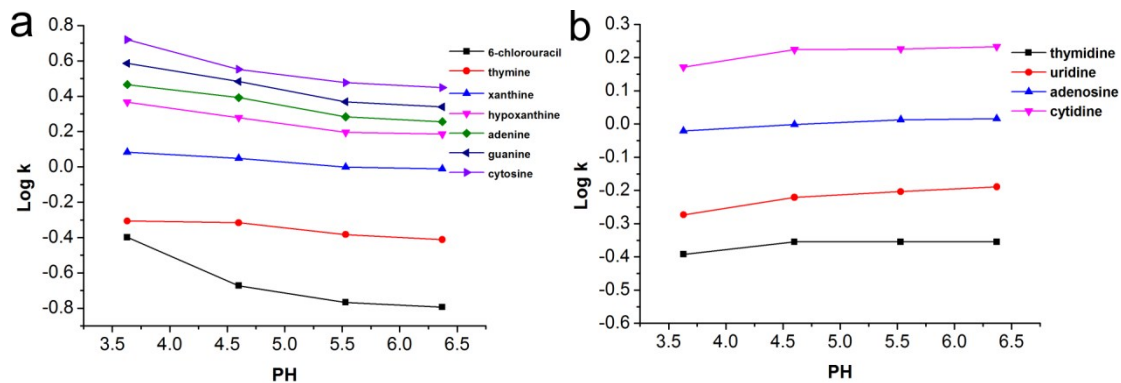

**SI-Fig. 7** Effect of pH on the retention factor ( $k$ ) with the 33 vol%  $\text{sol}_{\text{Au}}$  hybridized silica columns. Conditions: (a): 93% acetonitrile: 7% 20 mM ammonium acetate, T =

25 °C; (b): 85% acetonitrile, 15% 20 mM ammonium acetate, T = 25 °C; flow rate = 1.0 mL min<sup>-1</sup>, UV detection: 254 nm.

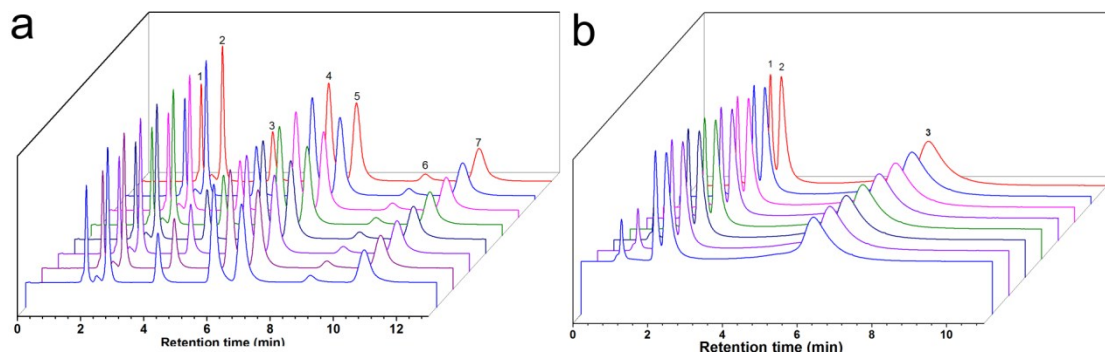

**SI-Fig. 8** (a): the reproducibility test of the 33 vol% sol<sub>Au</sub> hybridized silica column in the HILIC mode. (1) 6-chlorouracil, (2) thymine, (3) xanthine, (4) hypoxanthine, (5) adenine, (6) guanine, (7) cytosine; mobile phase: 93% acetonitrile: 7% 20 mM ammonium acetate, pH = 6.37, flow rate = 1.0 mL min<sup>-1</sup>, T = 25 °C, UV detection: 254nm; (b): the reproducibility test of the 33 vol% sol<sub>Au</sub> hybridized silica columns under the RPLC mode. (1) m-dihydroxybenzene, (2) o-dihydroxybenzene, (3) p-dihydroxybenzene; mobile phase: 100% deionized water, flow rate = 1.0 mL min<sup>-1</sup>, T = 25 °C, UV detection: 254 nm.

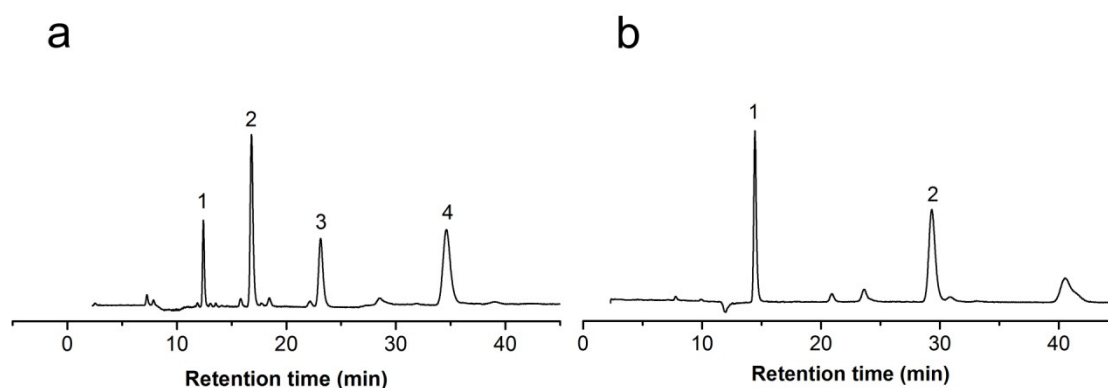

**SI-Fig. 9** Chromatograms for the separation of alkylbenzenes (a) and PAHs (b) on the C18 column. (a): (1) Benzene, (2) methylbenzene, (3) ethylbenzene, (4) propylbenzene, (b): (1) Benzene, (2) naphthaline; The experimental conditions were the same as Fig. 8.
